# Supplementary material for: Scientist Spotlight Homework Assignments Shift Students’ Stereotypes of Scientists and Enhance Science Identity in a Diverse Introductory Science Class
Source: Atypon-hosted journal article supplement (doi:10.1187/cbe.16-01-0002), 2016-09-01
Supplement: combinedsupmats.pdf [file combinedsupmats.pdf]

 


CBE--Life Sciences Education (LSE)


## Change Password

Old Password

New Password


Too Short
Weak
Medium
Strong
Very Strong
Too Long

#### Your password must have 8 characters or more and contain 3 of the following:

- a lower case character,
- an upper case character,
- a special character
- or a digit

Too Short

## Password Changed Successfully

Your password has been changed

- Search

  - Anywhere

  Quick Search anywhere

  Enter words / phrases / DOI / ISBN / keywords / authors / etc

  SearchSearch

  Advanced Search
- Sign in / Register

## Request Username

Can't sign in? Forgot your username?

Enter your email address below and we will send you your username

Email

Close

If the address matches an existing account you will receive an email with instructions to retrieve your username

Skip main navigation

*Close Drawer Menu**Open Drawer Menu*Home

- Home
- Current Issue
- Archive
- Article and Feature Collections
  - LSE 20th Anniversary Special
  - Approaches to Biology Teaching and Learning
  - Book Reviews
  - Current Insights
  - Change in Higher Education
  - Editorials
  - Special Issues
  - Evidence-Based Teaching Guides
  - Online With LSE
  - From the National Academies
  - Meeting Reports
  - Research Methods
  - WWW.Life Sciences Education
- ASCB Resources
  - ASCB Career Resources
  - Molecular Biology of the Cell
  - Join
- About
  - About LSE
  - Editorial Board
  - Information for Authors
  - Author Waivers
  - Email Alerts
  - Highlights Issues
  - Advertising


- Contact Us
- About
- Newsletter

The American Society for Cell Biology   
 6120 Executive Boulevard, Suite 750   
 Bethesda, MD 20852, USA   
 Phone: 301-347-9300   
 Fax: 301-347-9310

##### Links & Resources

- Information for Authors
- Submit an Article
- Permissions

##### About Us

- About CBE-LSE
- About ASCB
- Contact Us

##

- Life Sciences Education is published by the American Society for Cell Biology.  
  View the ASCB Privacy Policy.

© 2024 by The American Society for Cell Biology   
Powered by Atypon® Literatum
