# Supplementary material for: Scientist Spotlight Homework Assignments Shift Students’ Stereotypes of Scientists and Enhance Science Identity in a Diverse Introductory Science Class
Source: PubMed Central journal article supplement — CBE Life Sci Educ. 2016 Fall;15(3):ar47. doi: 10.1187/cbe.16-01-0002 (PMC5008894; doi:10.1187/cbe.16-01-0002), 2016
Supplement: supp_15.3.ar47_CombinedSupMats.pdf [file supp_15.3.ar47_CombinedSupMats.pdf]

# Supplemental Material

*CBE—Life Sciences Education*

Schinske *et al.*

# **Supplemental Materials**

Schinske *et al.*, 2016. Scientist Spotlight Homework Assignments Shift Students' Stereotypes of Scientists and Enhance Science Identity in a Diverse Introductory Science Class

## **Table of Contents**

|                                                                                                  |                 |
|--------------------------------------------------------------------------------------------------|-----------------|
| <b>Part A</b><br>List of Individuals Featured in Scientist Spotlight Assignments                 | <b>p. 1</b>     |
| <b>Part B</b><br>Sample Course Reader Homework Assignment                                        | <b>p. 2</b>     |
| <b>Part C</b><br>Table of Student Demographic Characteristics                                    | <b>p. 3</b>     |
| <b>Part D</b><br>Quantitative Web Survey Items                                                   | <b>p. 4-6</b>   |
| <b>Part E</b><br>Descriptive Statistics Listed by Hypothesis & Figure Number                     | <b>p. 7-9</b>   |
| <b>Part F</b><br>ANCOVA Tables Following Quantitative Analyses                                   | <b>p. 10-11</b> |
| <b>Part G</b><br>SALG Item Factor Analysis Methods                                               | <b>p. 12</b>    |
| <b>Part H</b><br>Quantitative Survey Items Constituting the "Science Interest" Scale             | <b>p. 13</b>    |
| <b>Part I</b><br>Word Clouds Depicting Students' Descriptions of Scientists at Three Time Points | <b>p. 14-17</b> |

## List of Individuals Featured In Scientist Spotlight Assignments

### Week 2

Charles Limb – Neuroscientist

### Week 3

Ben Barres – Neuroscientist

Dorit Ron – Neuroscientist

### Week 4

Erwin Chargaff – Biochemist

Francis Crick – Molecular Biologist

Rosalind Franklin – Chemist

James Watson – Molecular Biologist

Maurice Wilkins – Physicist and Molecular Biologist

### Week 5

Agnes Day – Microbiologist and Cancer Researcher

### Week 6

Raymond Dubois – Cancer Researcher

### Week 7

Lawrence David – Microbiologist

### Week 8

Thumbi Ndung'u – HIV/AIDS Researcher

### Week 9

Flossie Wong-Staal – Virologist and Molecular Biologist

Juan Perilla – Biophysicist

### Week 10

Min Chueh Chang – Reproductive Biologist

Carl Djerassi – Chemist

Luis Miramontes – Chemist

Gregory Pincus – Reproductive Biologist

Edris Rice-Wray – Reproductive Health Researcher

### Week 11

Darlene Cavalier – Citizen Scientist

### Reading Reflection Assignment #3

Read the article, titled *Cancer's Random Assault*, by Denise Grady (New York Times, January 5, 2015) found on pages 1-3 of your course reader. As you read, annotate (i.e., underline, note in margins) to identify:

#### Evidence

Information you think might be important to understand or consider more closely later

#### Interpretations & Difficulties

Your opinions or curiosities

Roadblocks or difficulties you had while reading

Once you finish, write 350 words or more summarizing your Evidence and Interpretations & Difficulties surrounding this article.

Supplemental Table 1

Racial (a) and Gender (b) Identities of Students in Scientist Spotlight Homework  
and Course Reader Homework Classes

a)

| <b>Racial/Ethnic Identities</b>                              | <b>Scientist Spotlight Homework Classes</b> | <b>Course Reader Homework Classes</b> |
|--------------------------------------------------------------|---------------------------------------------|---------------------------------------|
| Latina/o                                                     | 22%                                         | 27%                                   |
| White                                                        | 21%                                         | 16%                                   |
| Vietnamese                                                   | 9%                                          | 10%                                   |
| Filipina/o or Pacific Islander                               | 9%                                          | 4%                                    |
| Chinese                                                      | 8%                                          | 8%                                    |
| Asian                                                        | 5%                                          | 6%                                    |
| Korean                                                       | 3%                                          | 4%                                    |
| Black                                                        | 3%                                          | 3%                                    |
| Indian (Asia)                                                | 3%                                          | 2%                                    |
| Persian                                                      | 2%                                          | 2%                                    |
| Indonesian                                                   | 0.6%                                        | 3%                                    |
| Japanese                                                     | 0.3%                                        | 2%                                    |
| Others                                                       | 2%                                          | 4%                                    |
| Multiple Races                                               | 11%                                         | 10%                                   |
| Decline to State                                             | 2%                                          | 0%                                    |
| Proportion of students from underserved racial/ethnic groups | 55%                                         | 51%                                   |

b)

| <b>Gender Identities</b> | <b>Scientist Spotlight Homework Classes</b>                       | <b>Course Reader Homework Classes</b>                                    |
|--------------------------|-------------------------------------------------------------------|--------------------------------------------------------------------------|
| Female                   | 58%                                                               | 56%                                                                      |
| Male                     | 40%                                                               | 44%                                                                      |
| Transgender              | 1%                                                                | 1%                                                                       |
| Other                    | 1 student declined to state and 1 student identified as "agender" | 1 student declined to state and 1 student identified as "gender neutral" |

Attitudes

Please share your opinions of the statements below. There are absolutely no right or wrong answers, and nothing would be better than to see a wide variety of ideas from different students in class. You will not be graded based on the way you answer any of these questions.

Presently, I am...

|                                                                                         | Not at all            | Just a little         | Somewhat              | A lot                 | A great deal          |
|-----------------------------------------------------------------------------------------|-----------------------|-----------------------|-----------------------|-----------------------|-----------------------|
| * Enthusiastic about this subject                                                       | <input type="radio"/> |
| * Interested in discussing this subject area with friends or family                     | <input type="radio"/> |
| * Interested in taking or planning to take additional classes in this subject           | <input type="radio"/> |
| * Interested in pursuing a science career                                               | <input type="radio"/> |
| Confident that I understand this subject                                                | <input type="radio"/> |
| Confident that I can do this subject                                                    | <input type="radio"/> |
| Comfortable working with complex ideas                                                  | <input type="radio"/> |
| Willing to seek help from others (teacher, peers, TA) when working on academic problems | <input type="radio"/> |

\*Items included in the "Science Interest" scale (see also Supp Mat Parts G-H)

## Background information...

**I have the profoundest appreciation and respect for your background, identity, and aspirations. Though the information below only gives a small glimpse into these aspects of your life, it is a helpful start to understanding who I will be serving this quarter and will help me ensure I serve all my students in an equitable manner.**

What best characterizes your major, past coursework, and career interests?

|                                                                    | Strongly Disagree     | Disagree              | Mildly Disagree       | Mildly Agree          | Agree                 | Strongly Agree        |
|--------------------------------------------------------------------|-----------------------|-----------------------|-----------------------|-----------------------|-----------------------|-----------------------|
| I am majoring or plan on majoring in Biology                       | <input type="radio"/> |
| I am majoring or plan on majoring in another Science or Math field | <input type="radio"/> |
| I am majoring or plan on majoring in a different subject           | <input type="radio"/> |
| My major is undecided at this time                                 | <input type="radio"/> |
| I am considering a career in a human health related field          | <input type="radio"/> |

Regarding your past science classes...

|                                                                   | Yes                   | No                    |
|-------------------------------------------------------------------|-----------------------|-----------------------|
| Is Bio 11 the first COLLEGE science class you've taken?           | <input type="radio"/> | <input type="radio"/> |
| Is Bio 11 the first science class you've EVER taken at any level? | <input type="radio"/> | <input type="radio"/> |

I identify as (choose all that apply)

- Female
- Male
- Transgender
- Decline to State
- Other (please specify)

I most closely identify as (choose all that apply)

- |                                                       |                                                          |
|-------------------------------------------------------|----------------------------------------------------------|
| <input type="checkbox"/> Black/African American       | <input type="checkbox"/> Laotian                         |
| <input type="checkbox"/> Cambodian                    | <input type="checkbox"/> Latino/Chicano/Hispanic         |
| <input type="checkbox"/> Chinese                      | <input type="checkbox"/> Native American/American Indian |
| <input type="checkbox"/> Filipino or Pacific Islander | <input type="checkbox"/> Persian                         |
| <input type="checkbox"/> Hmong                        | <input type="checkbox"/> Vietnamese                      |
| <input type="checkbox"/> Indian (Asia)                | <input type="checkbox"/> White                           |
| <input type="checkbox"/> Japanese                     | <input type="checkbox"/> Asian                           |
| <input type="checkbox"/> Korean                       | <input type="checkbox"/> Decline to state                |
| <input type="checkbox"/> Other (please specify)       |                                                          |

The first language I learned to speak was...

- |                                        |                                     |
|----------------------------------------|-------------------------------------|
| <input type="checkbox"/> Arabic        | <input type="checkbox"/> Mandarin   |
| <input type="checkbox"/> Cantonese     | <input type="checkbox"/> Punjabi    |
| <input type="checkbox"/> English       | <input type="checkbox"/> Spanish    |
| <input type="checkbox"/> Farsi/Persian | <input type="checkbox"/> Tagalog    |
| <input type="checkbox"/> Hindi         | <input type="checkbox"/> Vietnamese |
| <input type="checkbox"/> Korean        |                                     |

Other (please specify)



## Descriptive Statistics Listed by Hypothesis Number & Figure Number

### Hypothesis 1 (Descriptions of Scientists):

#### Treatment Effects On Use of Stereotypical Descriptions of Scientists

| Group                        | Time                | Raw Mean Percent Stereotypes Used | Raw Std. Error | Weighted Mean Percent Stereotypes Used | Weighted Std. Error |
|------------------------------|---------------------|-----------------------------------|----------------|----------------------------------------|---------------------|
| Course Reader Homework       | Beginning of Course | 67.173                            | 3.972          | 67.384                                 | 4.079               |
|                              | End of Course       | 63.191                            | 3.585          | 18.312                                 | 2.973               |
| Scientist Spotlight Homework | Beginning of Course | 61.917                            | 2.369          | 51.131                                 | 1.959               |
|                              | End of Course       | 41.888                            | 2.004          | 31.077                                 | 1.428               |

#### Treatment Effects On Use of Nonstereotypical Descriptions of Scientists (Fig. 1)

| Group                        | Time                | Raw Mean Percent Nonstereotypes Used | Raw Std. Error | Weighted Mean Percent Nonstereotypes Used | Weighted Std. Error |
|------------------------------|---------------------|--------------------------------------|----------------|-------------------------------------------|---------------------|
| Course Reader Homework       | Beginning of Course | 13.496                               | 2.186          | 43.771                                    | 2.836               |
|                              | End of Course       | 9.346                                | 2.924          | 41.925                                    | 1.471               |
| Scientist Spotlight Homework | Beginning of Course | 18.527                               | 1.115          | 34.427                                    | 1.362               |
|                              | End of Course       | 54.421                               | 2.018          | 47.781                                    | .706                |

### Hypothesis 2 (Relating to Scientists):

#### Treatment Effects On Ratings of Relatability to Scientists (Fig. 2)

| Group                        | Time                | Weighted Mean Level of Agreement w/Relatability Prompt | Std. Error |
|------------------------------|---------------------|--------------------------------------------------------|------------|
| Course Reader Homework       | Beginning of Course | 1.926                                                  | .186       |
|                              | End of Course       | 2.006                                                  | .100       |
| Scientist Spotlight Homework | Beginning of Course | 2.113                                                  | .168       |
|                              | End of Course       | 2.987                                                  | .090       |

## Longitudinal Trends Regarding Hypotheses 1 and 2:

### Longitudinal Trends in Stereotypical Descriptions of Scientists Following Scientist Spotlights (Fig. 4a)

| Time                | Mean Percent Stereotypes Used | Std. Error |
|---------------------|-------------------------------|------------|
| Beginning of Course | 71.025                        | 4.558      |
| End of Course-test  | 46.920                        | 4.548      |
| 6 Mos After Course  | 45.889                        | 5.342      |

### Longitudinal Trends in Nonstereotypical Descriptions of Scientists Following Scientist Spotlights (Fig. 4b)

| Time                | Mean Percent Nonstereotypes Used | Std. Error |
|---------------------|----------------------------------|------------|
| Beginning of Course | 11.452                           | 2.755      |
| End of Course-test  | 50.989                           | 4.528      |
| 6 Mos After Course  | 51.627                           | 5.190      |

### Longitudinal Trends in Ratings of Scientist Relatability Following Scientist Spotlights (Fig. 4c)

| Time                | Mean Level of Agreement w/Relatability Prompt | Std. Error |
|---------------------|-----------------------------------------------|------------|
| Beginning of Course | 1.846                                         | .192       |
| End of Course-test  | 3.000                                         | .200       |
| 6 Mos After Course  | 3.000                                         | .231       |

Hypothesis 3 (Science Interest):

**Changes in Stereotypical Descriptions of Scientists & Changes in Science Interest (Fig. 5a)**

| Group                                                | Time                | Mean Science Interest | Std. Error |
|------------------------------------------------------|---------------------|-----------------------|------------|
| Students that Shifted to Use Fewer Stereotypes       | Beginning of Course | 3.312                 | .114       |
|                                                      | End of Course       | 3.574                 | .092       |
| Students that Did Not Shift to Use Fewer Stereotypes | Beginning of Course | 3.591                 | .153       |
|                                                      | End of Course       | 3.479                 | .123       |

**Changes in Nonstereotypical Descriptions of Scientists & Changes in Science Interest (Fig. 5b)**

| Group                                                  | Time                | Mean Science Interest | Std. Error |
|--------------------------------------------------------|---------------------|-----------------------|------------|
| Students that Shifted to Use More Nonstereotypes       | Beginning of Course | 3.374                 | .068       |
|                                                        | End of Course       | 3.607                 | .055       |
| Students that Did Not Shift to Use More Nonstereotypes | Beginning of Course | 3.528                 | .176       |
|                                                        | End of Course       | 3.446                 | .141       |

**Changes in Ratings of Relating to Scientists & Changes in Science Interest**

| Group                                                            | Time                | Mean Science Interest | Std. Error |
|------------------------------------------------------------------|---------------------|-----------------------|------------|
| Students that Did Not Shift to Rate Scientists as More Relatable | Beginning of Course | 3.485                 | .109       |
|                                                                  | End of Course       | 3.586                 | .087       |
| Students that Shifted to Rate Scientists as More Relatable       | Beginning of Course | 3.287                 | .076       |
|                                                                  | End of Course       | 3.568                 | .061       |

Hypothesis 4 (Course Grades):

**Treatment & Course Grades (Fig. 6a)**

| Group                        | Mean Course Grade | Std. Error |
|------------------------------|-------------------|------------|
| Course Reader Homework       | 2.236             | .225       |
| Scientist Spotlight Homework | 2.863             | .080       |

**Use of Nonstereotypes & Course Grades (Fig. 6b)**

| Group                                                  | Mean Course Grade | Std. Error |
|--------------------------------------------------------|-------------------|------------|
| Students that Did Not Shift to Use More Nonstereotypes | 2.562             | .172       |
| Students that Shifted to Use More Nonstereotypes       | 3.052             | .073       |

## ANCOVA Tables Following Quantitative Analyses

### Hypotheses 1 & 2

#### *Changes in Perception of Scientists from Pre-Test to Post-Test*

|                            | <i>df</i> | <i>F</i> | $\eta$ | <i>p</i> |
|----------------------------|-----------|----------|--------|----------|
| Stereotypes                | (1,311)   | 27.76    | .08    | < .001   |
| Stereotypes x Condition    | (1,311)   | 13.39    | .04    | < .001   |
| Nonstereotypes             | (1,311)   | .69      | < .01  | .405     |
| Nonstereotypes x Condition | (1,311)   | 16.51    | .05    | < .001   |
| Relatability               | (1,276)   | .80      | < .01  | .373     |
| Relatability x Condition   | (1,276)   | 8.49     | .03    | .004     |

*Note:* All analyses conducted with gender, race (traditionally well- vs. under-served), and course section controlled as covariates.

### Hypothesis 1 & 2 (Longitudinal Trends)

#### *Longitudinal Changes in Perception of Scientists at 6mos*

|                | <i>df</i> | <i>F</i> | $\eta$ | <i>p</i> |
|----------------|-----------|----------|--------|----------|
| Stereotypes    | (2,78)    | 4.36     | .10    | .016     |
| Nonstereotypes | (2,80)    | 5.97     | .13    | .004     |
| Relatability   | (2,46)    | 2.63     | .10    | .083     |

*Note:* All analyses conducted with gender and race (traditionally well- vs. under-served) controlled as covariates.

### Hypothesis 3

#### *Shifts in Scientist Stereotypes, Interest in Science, and Interest in STEM Major*

|                                   | <i>df</i> | <i>F</i> | $\eta$ | <i>p</i> |
|-----------------------------------|-----------|----------|--------|----------|
| Science Interest x STEM Major     | (1,216)   | 10.39    | .05    | .001     |
| Science Interest x Stereotypes    | (1,182)   | 4.46     | .03    | .036     |
| Science Interest x Nonstereotypes | (1,182)   | 3.32     | .02    | .070     |
| Science Interest x Relatability   | (1,184)   | 2.10     | .01    | .149     |

*Note:* All analyses conducted with gender, race (traditionally well- vs. under-served), previous science experience, and course section controlled as covariates.

---

**Hypothesis 4***Shifts in Scientist Stereotypes, Relatability, and Grade*

---

|                        | <i>df</i> | <i>F</i> | <i>η</i> | <i>p</i> |
|------------------------|-----------|----------|----------|----------|
| Treatment x Grade      | (1,279)   | 6.682    | .02      | .018     |
| Stereotypes x Grade    | (1,211)   | 3.00     | .01      | .085     |
| Nonstereotypes x Grade | (1,211)   | 6.68     | .03      | .010     |
| Relatability x Grade   | (1,171)   | 1.65     | .02      | .195     |

---

*Note:* All analyses conducted with gender, race (traditionally well- vs. under-served), course section, and previous college science experience controlled as covariates.

---

## Factor Analysis & Creation of the Science Interest Scale

The eight items adapted from the SALG (Seymour et al., 2000; Supp Materials Part D) were highly correlated, with nearly all  $r$ -values above .30 and  $p$ -values less than .001 (see table below for a complete list of item correlations). Despite the strong positive relationship between the majority of the items, a review of the questions suggested that there were two distinct constructs assessed by the scale, and that separating these out could provide additional insight into participants' experiences with the Scientist Spotlights. In order to clarify these relationships, reduce noise, and maximize the variance explained, we conducted a principal components factor analysis using a promax rotation. Seven of the eight items loaded on two factors, together explaining 55% of the variance and all with loadings over .6. Ultimately, this resulted in the subscale we titled "Science Interest" ( $\alpha = .831$ , see Supp Materials Part H for items and factor loadings). This subscale was used to calculate both beginning- and end-of-course Science Interest scores for each student.

Correlations Between Eight Modified SALG Items

|                                                                                            | 1     | 2     | 3     | 4     | 5     | 6     | 7     | 8 |
|--------------------------------------------------------------------------------------------|-------|-------|-------|-------|-------|-------|-------|---|
| 1. Enthusiastic about this subject                                                         | —     |       |       |       |       |       |       |   |
| 2. Interested in discussing this subject area with friends or family                       | .653* | —     |       |       |       |       |       |   |
| 3. Interested in taking or planning to take additional classes in this subject             | .639* | .568* | —     |       |       |       |       |   |
| 4. Interested in pursuing a science career                                                 | .479* | .408* | .692* | —     |       |       |       |   |
| 5. Confident that I understand this subject                                                | .439* | .396* | .443* | .365* | —     |       |       |   |
| 6. Confident that I can do this subject                                                    | .359* | .314* | .309* | .203* | .671* | —     |       |   |
| 7. Comfortable working with complex ideas                                                  | .360* | .385* | .324* | .234* | .562* | .678* | —     |   |
| 8. Willing to seek help from others (teacher, peers, TA) when working on academic problems | .151  | .237* | .115  | .082  | .100  | .268* | .238* | — |

Note: items marked \* are significant at  $p < .001$

### Quantitative Survey Items Constituting the “Science Interest” Scale

*Factor Loadings for From Principal Component Factor Analysis with Promax Rotation for the Adapted Student Assessment of their Learning Gains Questionnaire*

| Item                                                                                       | Factor loading |
|--------------------------------------------------------------------------------------------|----------------|
| Factor 1: Science Interest ( $\alpha = .83$ )                                              |                |
| 3. Interested in taking or planning to take additional classes in this subject             | .89            |
| 1. Enthusiastic about this subject                                                         | .77            |
| 4. Interested in pursuing a science career                                                 | .70            |
| 2. Interested in discussing this subject area with friends or family                       | .69            |
| Factor 2: Science Confidence ( $\alpha = .84$ )                                            |                |
| 6. Confident that I can do this subject                                                    | .92            |
| 7. Comfortable working with complex ideas                                                  | .76            |
| 5. Confident that I understand this subject                                                | .72            |
| Cross-Loaded Items (Dropped)                                                               |                |
| 8. Willing to seek help from others (teacher, peers, TA) when working on academic problems | .17/.27        |

*Note.* N = 267 and  $\alpha = .83$  for entire measure.

## Word Clouds Depicting Students' Descriptions of Scientists at Three Time Points

We created word clouds to visually represent students' descriptions of scientists using the tools at <http://www.wordle.net/>. Word clouds represent an increasingly popular tool for visualizing qualitative data (Henderson and Segal, 2013). They graphically represent word counts by showing more prevalent words in larger font sizes and less prevalent words in smaller font sizes. Though word clouds remove words from their contexts and can sometimes appear to overemphasize long words, they have the potential to serve as powerful tools in qualitative studies when the words are linked back to their original contexts through full quotations (Henderson and Segal, 2013). The following pages depict students' descriptions in essays from the beginning of the course, the end of the course, and 6 months after the course. These word clouds were generated using the lists of descriptions of scientists produced when quantifying students' responses to the stereotypes prompt.

Henderson, S., & Segal, E. H. (2013). Visualizing qualitative data in evaluation research. *New Directions for Evaluation*, 2013(139), 53-71.



Beginning of Course

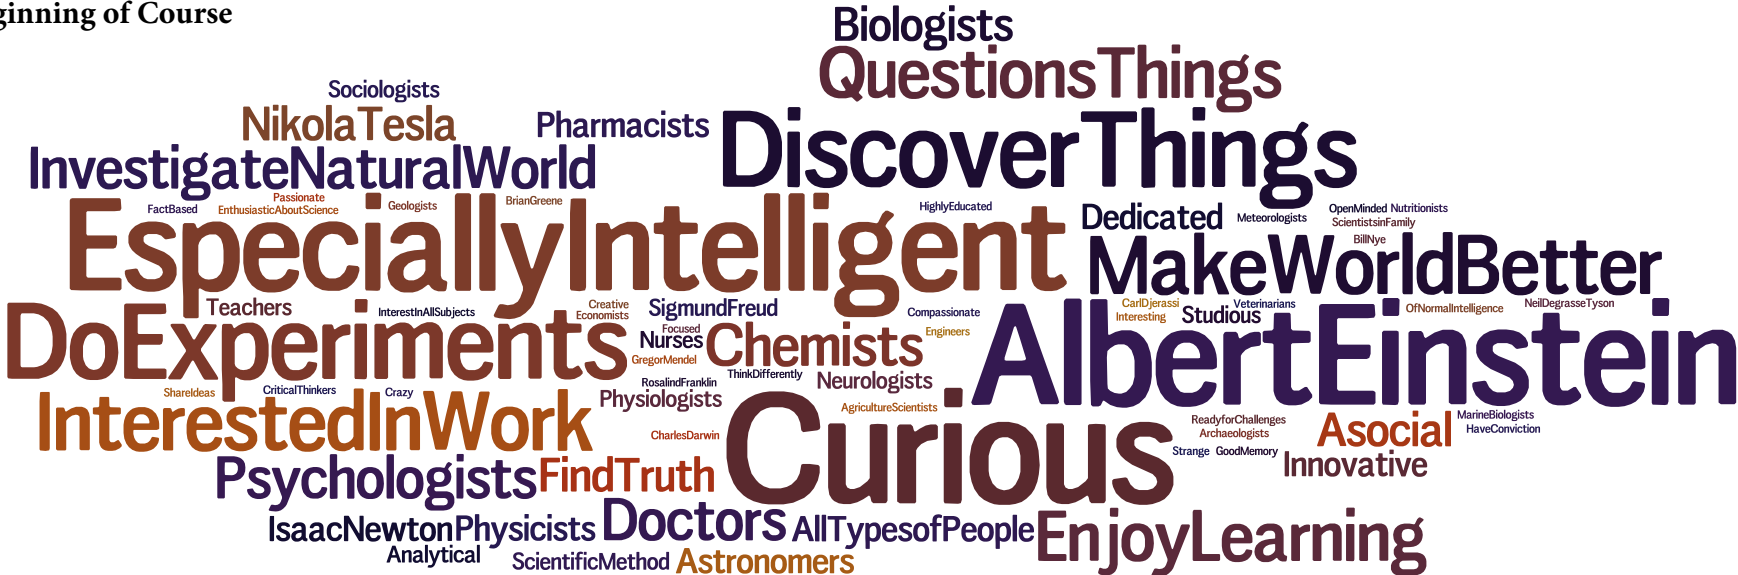

End of Course



A word cloud visualization showing various terms and names associated with the course. The most prominent words, shown in the largest fonts, are "No One Type of Person", "All Types of People", "Do Experiments", "Go Against Stereotypes", "Interested in Work", "Passionate", "Creative", "Curious", and "Dedicated". Numerous smaller words and names are scattered throughout, including "From Small Towns", "Cowboys", "Find Truth", "Have Conviction", "Psychologists", "Confident", "Teachers", "Investigate Natural World", "Struggled Financially", "Especially Intelligent", "Overly Involved in Work", "Interested in Money", "Thumbi Ndungu", "Musicians", "Highly Educated", "Francis Crick", "Rosalind Franklin", "Transgendered", "Lawrence David", "Enthusiastic About Science", "Chemists", "Modest", "Mostly Men", "Make Mistakes", "Enjoy Learning", "Stubborn", "Make World Better", "Arrogant", "James Watson", "Darlene Cavalier", "Discover Things", "Not Initially Interested", "Cheerleaders", "Immunigrants", "Ben Barres", "Luis Miramontes", "Young and Old", "Work with Data", "Ready for Challenges", "Scientists", "Charles Limb", "Studios", "Carl Djerassi", "Steal Ideas", and "Carroll". The colors of the text range from dark blue/purple to dark red, with larger words in darker shades and smaller words in lighter shades.

No One Type of Person

Do Experiments

Go Against Stereotypes

All Types of People

Interested in Work

Passionate

Creative

Curious

Dedicated

From Small Towns

Cowboys

Find Truth

Have Conviction

Psychologists

Confident

Teachers

Investigate Natural World

Struggled Financially

Especially Intelligent

Overly Involved in Work

Interested in Money

Thumbi Ndungu

Musicians

Highly Educated

Francis Crick

Rosalind Franklin

Transgendered

Lawrence David

Enthusiastic About Science

Chemists

Modest

Mostly Men

Make Mistakes

Enjoy Learning

Stubborn

Make World Better

Arrogant

James Watson

Darlene Cavalier

Discover Things

Not Initially Interested

Cheerleaders

Immunigrants

Ben Barres

Luis Miramontes

Young and Old

Work with Data

Ready for Challenges

Scientists

Charles Limb

Studios

Carl Djerassi

Steal Ideas

6 Mos After Course

All types of People

Immigrants  
Dedicated Do Experiments Creative Carl Djerassi Ready for Challenges  
Imaginative  
Cowboys Margaret Sanger Inspired by Others  
No One Type of Person Of Normal Intelligence More Than Just Experimenting Ben Barres Albert Einstein Alexander Fleming  
Scientific Method Steal Ideas Strive for Success Doctors Mostly Men Gregory Mendel Lawrence David Boring Gregory Pincus Funny Scientist in Family Wonder  
Flossie Wong Staal Cheerleaders Maurice Wilkins James Watson Charles Darwin  
Innovative Not Initially Interested Citizen Scientists Discover Things  
Go Against Stereotypes Confident Questions Things Compassionate  
Enjoy Learning Arrogant Lucky  
Struggled Financially Interested in Work Make World Better Curious Rosalind Franklin Overly Involved in Work  
Investigate the Natural World Transgendered Proud  
Sometimes Unappreciated
